# Supplementary material for: Biobank-scale characterization of Alzheimer’s disease and related dementias identifies potential disease-causing variants, risk factors, and genetic modifiers across diverse ancestries
Source: bioRxiv or medRxiv preprint supplement (doi:10.1101/2024.11.03.24313587), 2024-11-17
Supplement: Supplementary file [file media-1.pdf]

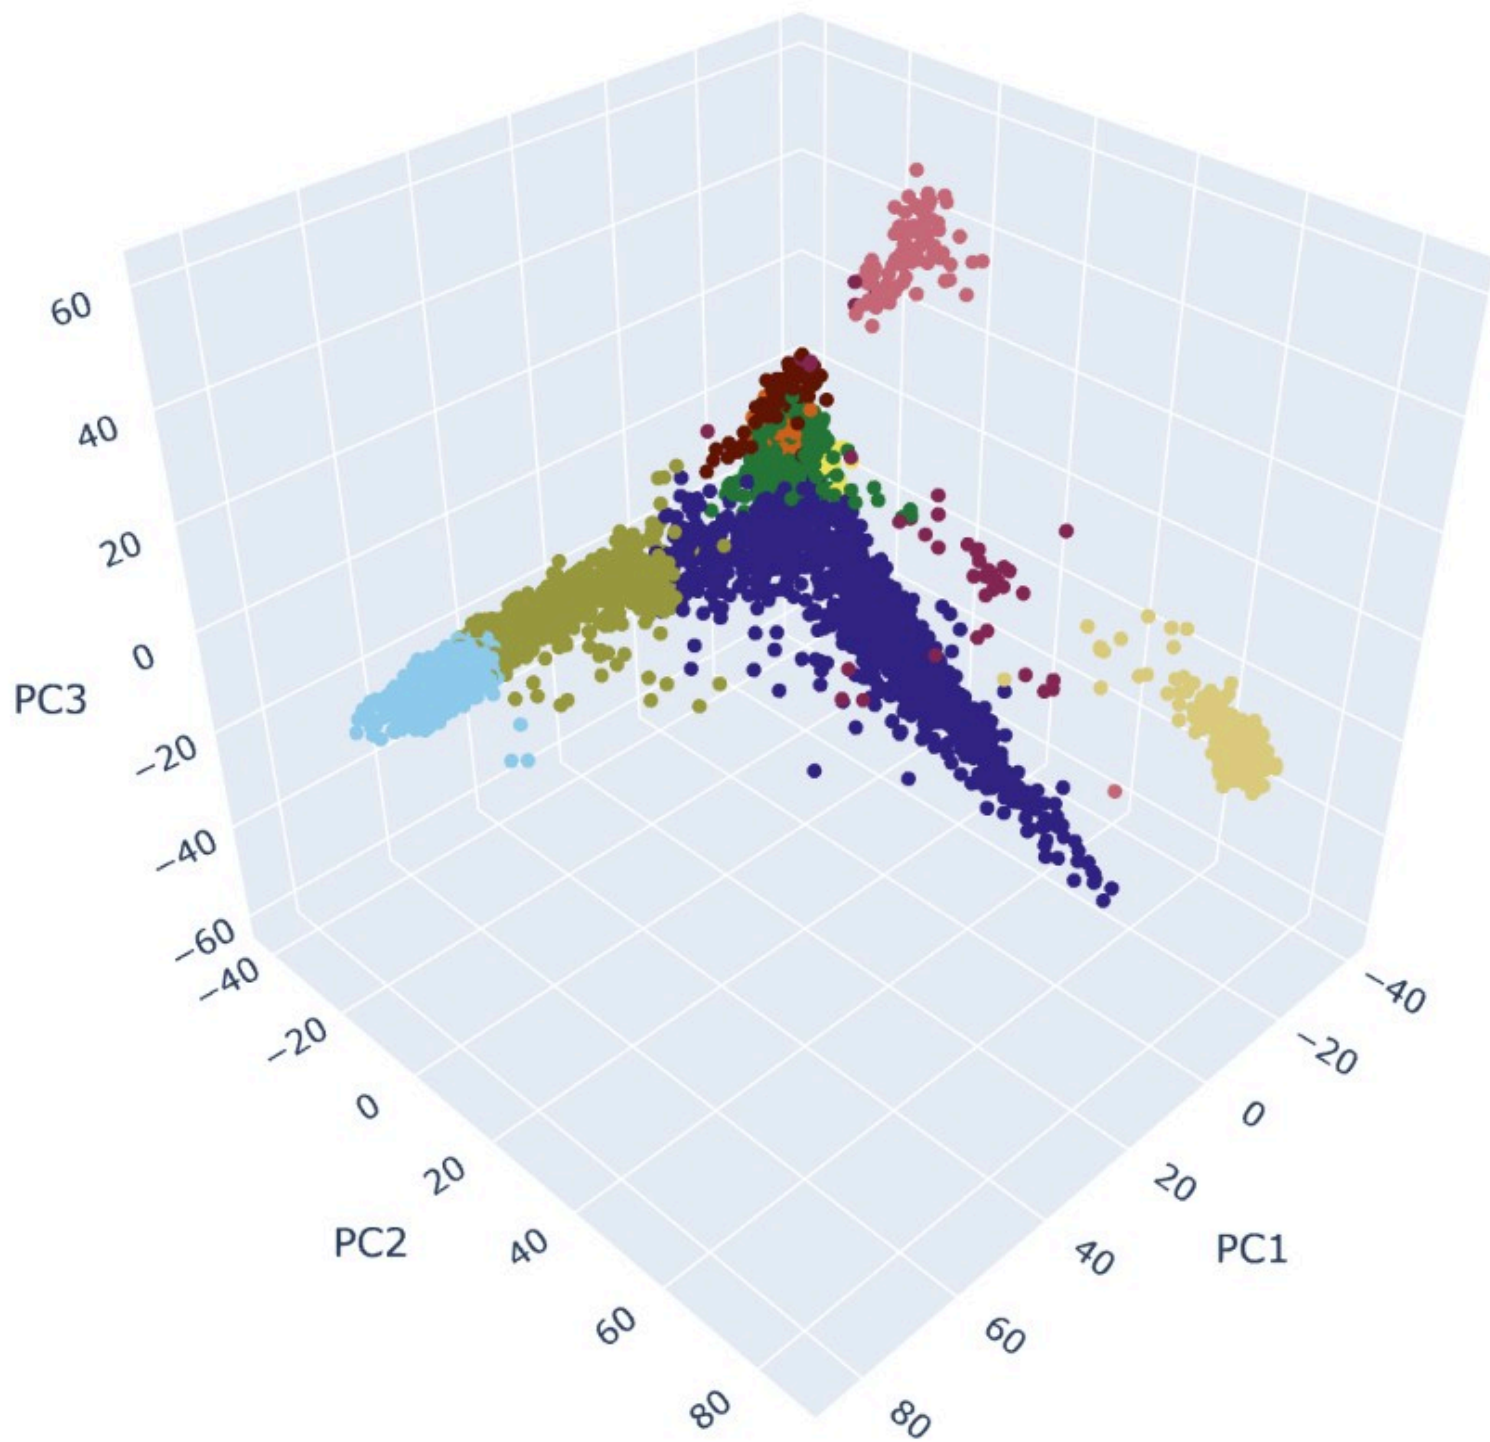

- label
- AMR
  - EUR
  - AFR
  - AJ
  - SAS
  - AAC
  - MDE
  - EAS
  - CAS
  - FIN
