# Supplementary material for: Biobank-scale characterization of Alzheimer’s disease and related dementias identifies potential disease-causing variants, risk factors, and genetic modifiers across diverse ancestries
Source: bioRxiv or medRxiv preprint supplement (doi:10.1101/2024.11.03.24313587), 2024-11-17

Allele frequencies of variants across all ancestries in UKB

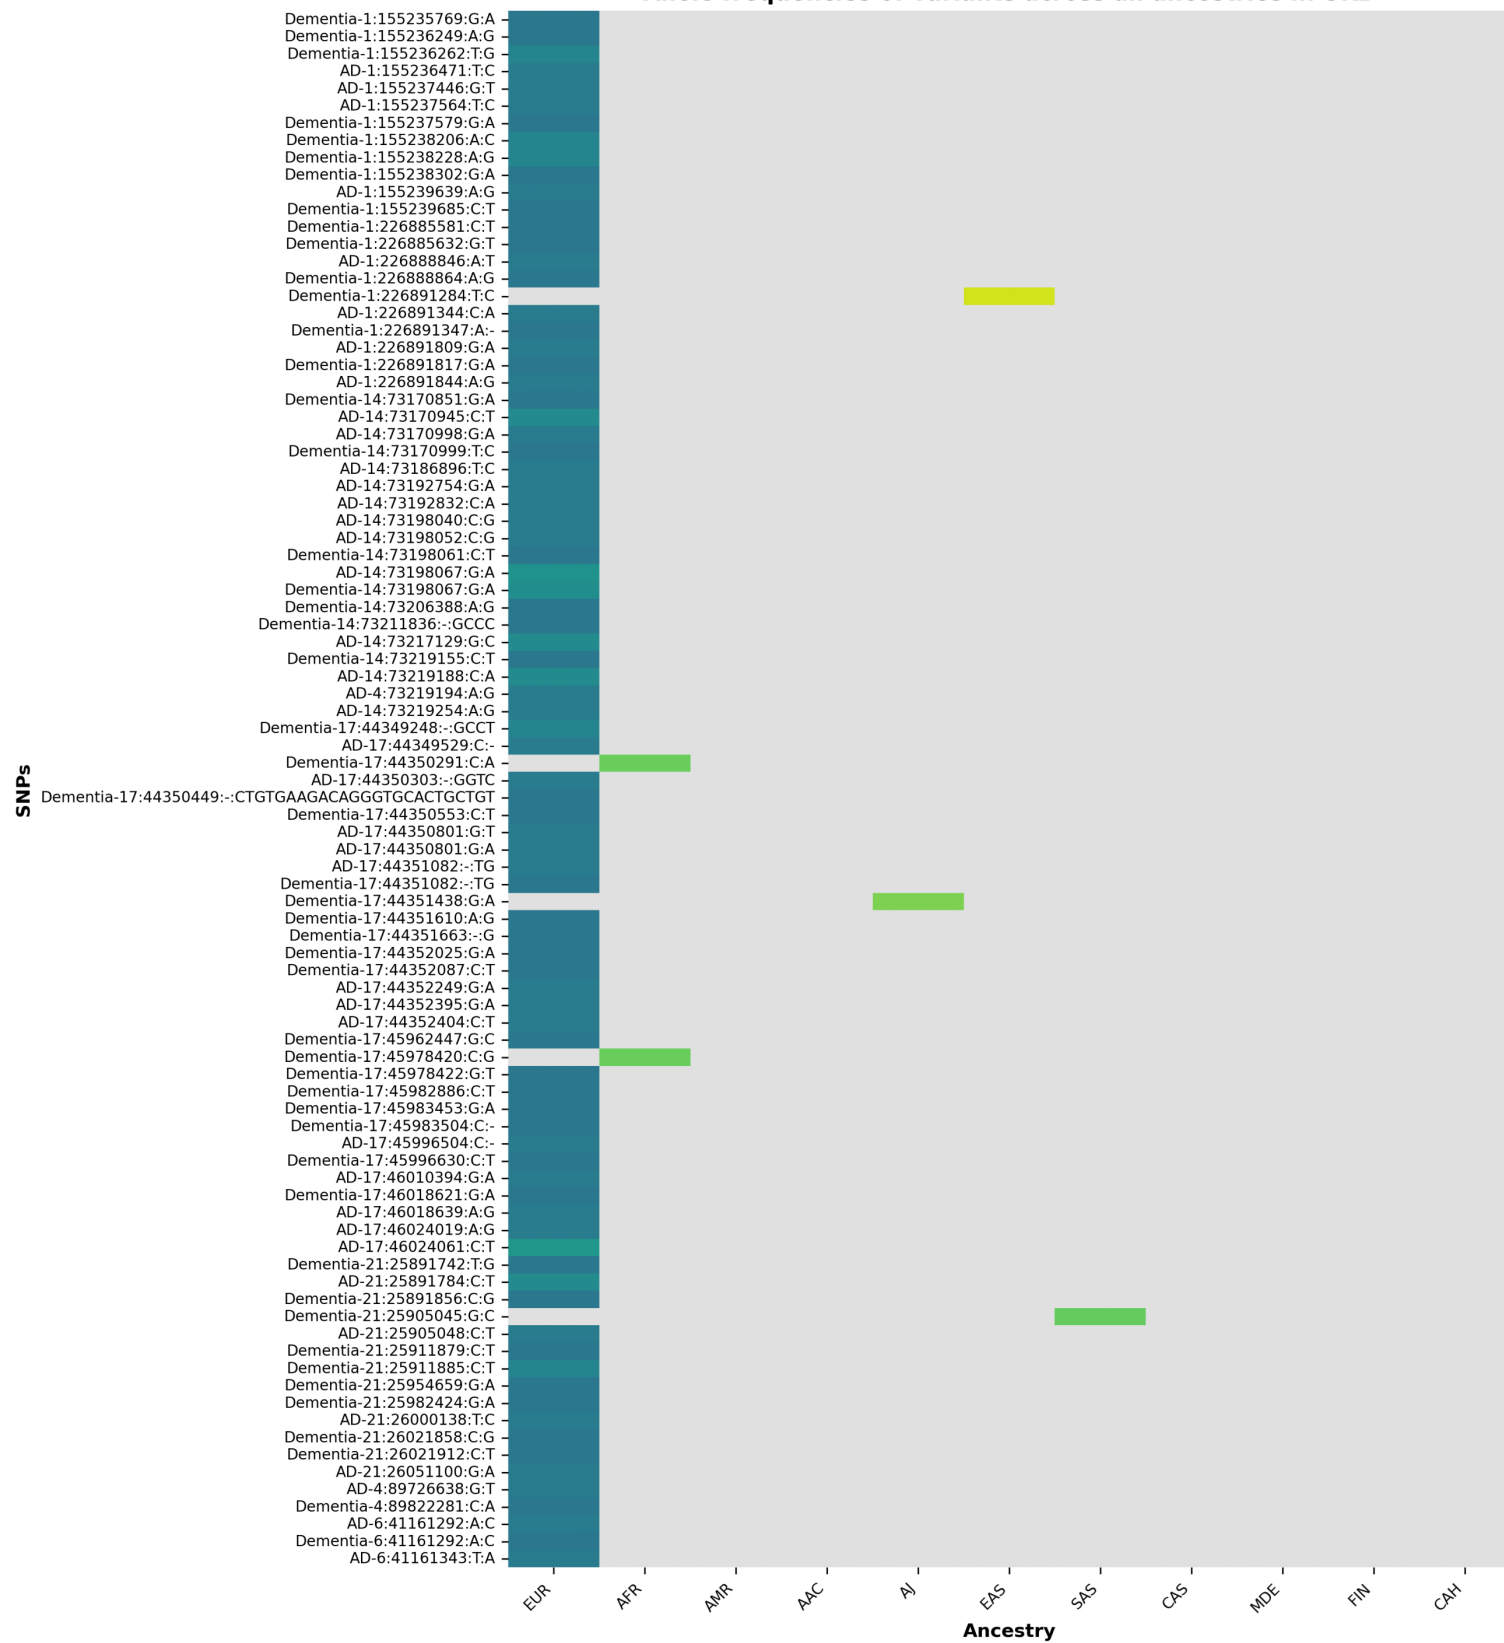

Allele frequencies of variants across all ancestries in AoU

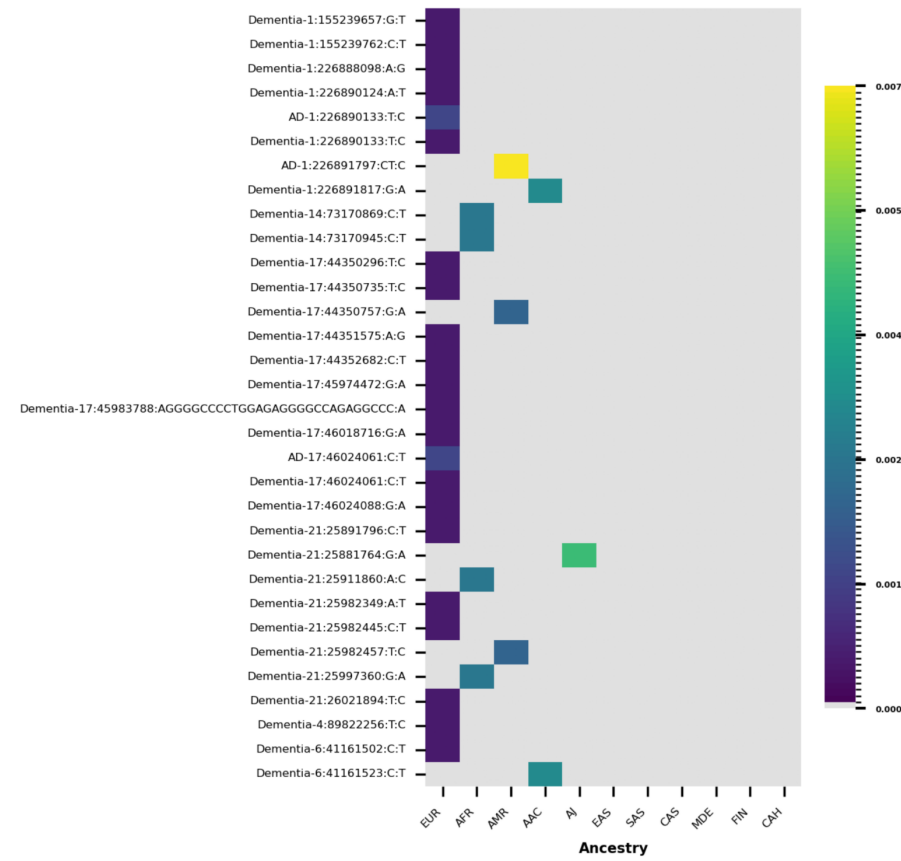

Allele frequencies of variants across all ancestries in ADSP

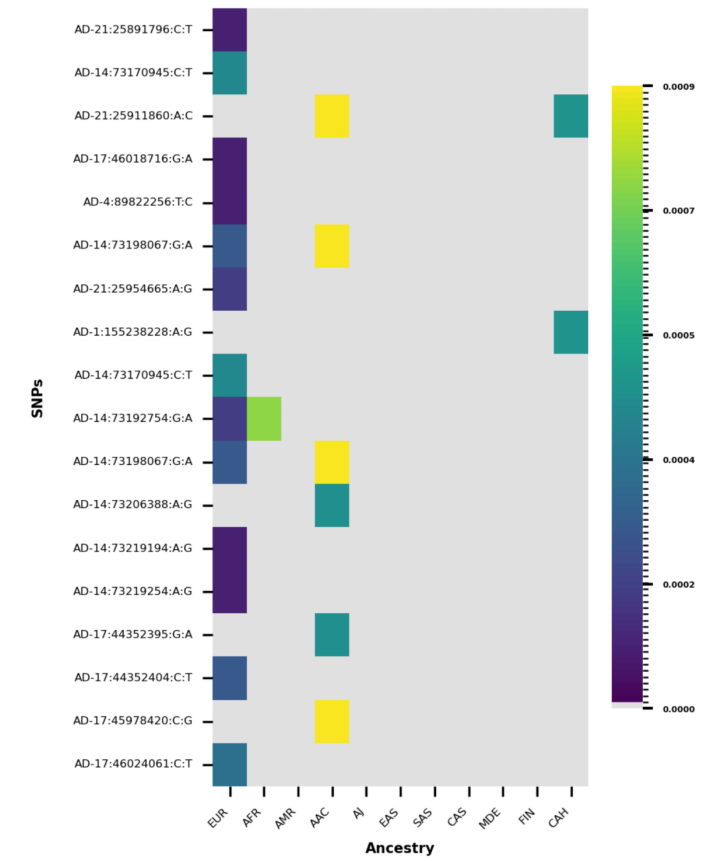

Allele frequencies of variants across all ancestries in 100KGP

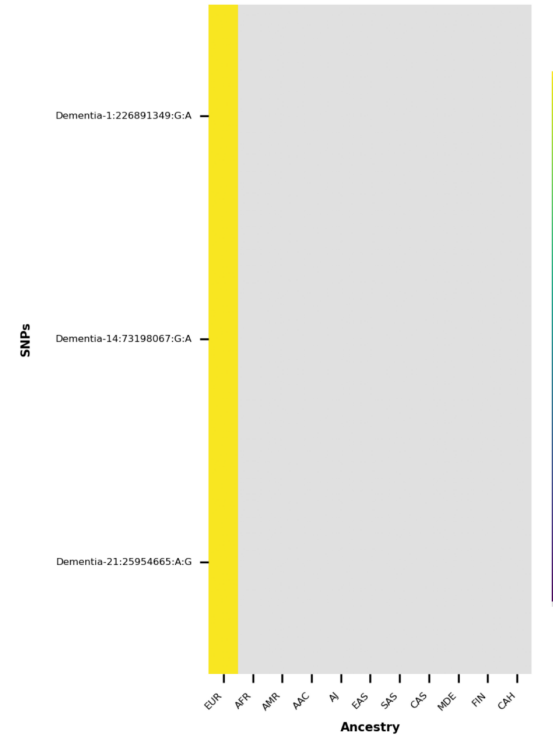

Allele frequencies of variants across all ancestries in AMP PD

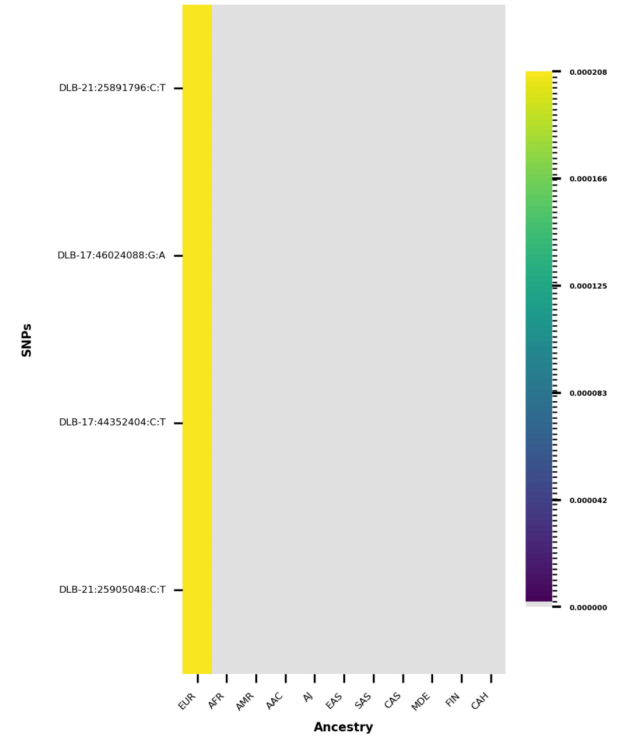

Supplement: Supplementary file [file media-6.pdf]
