# Supplementary material for: Biobank-scale characterization of Alzheimer’s disease and related dementias identifies potential disease-causing variants, risk factors, and genetic modifiers across diverse ancestries
Source: bioRxiv or medRxiv preprint supplement (doi:10.1101/2024.11.03.24313587), 2024-11-17

Proportions of APOE Genotypes Across Different Ancestries in Controls

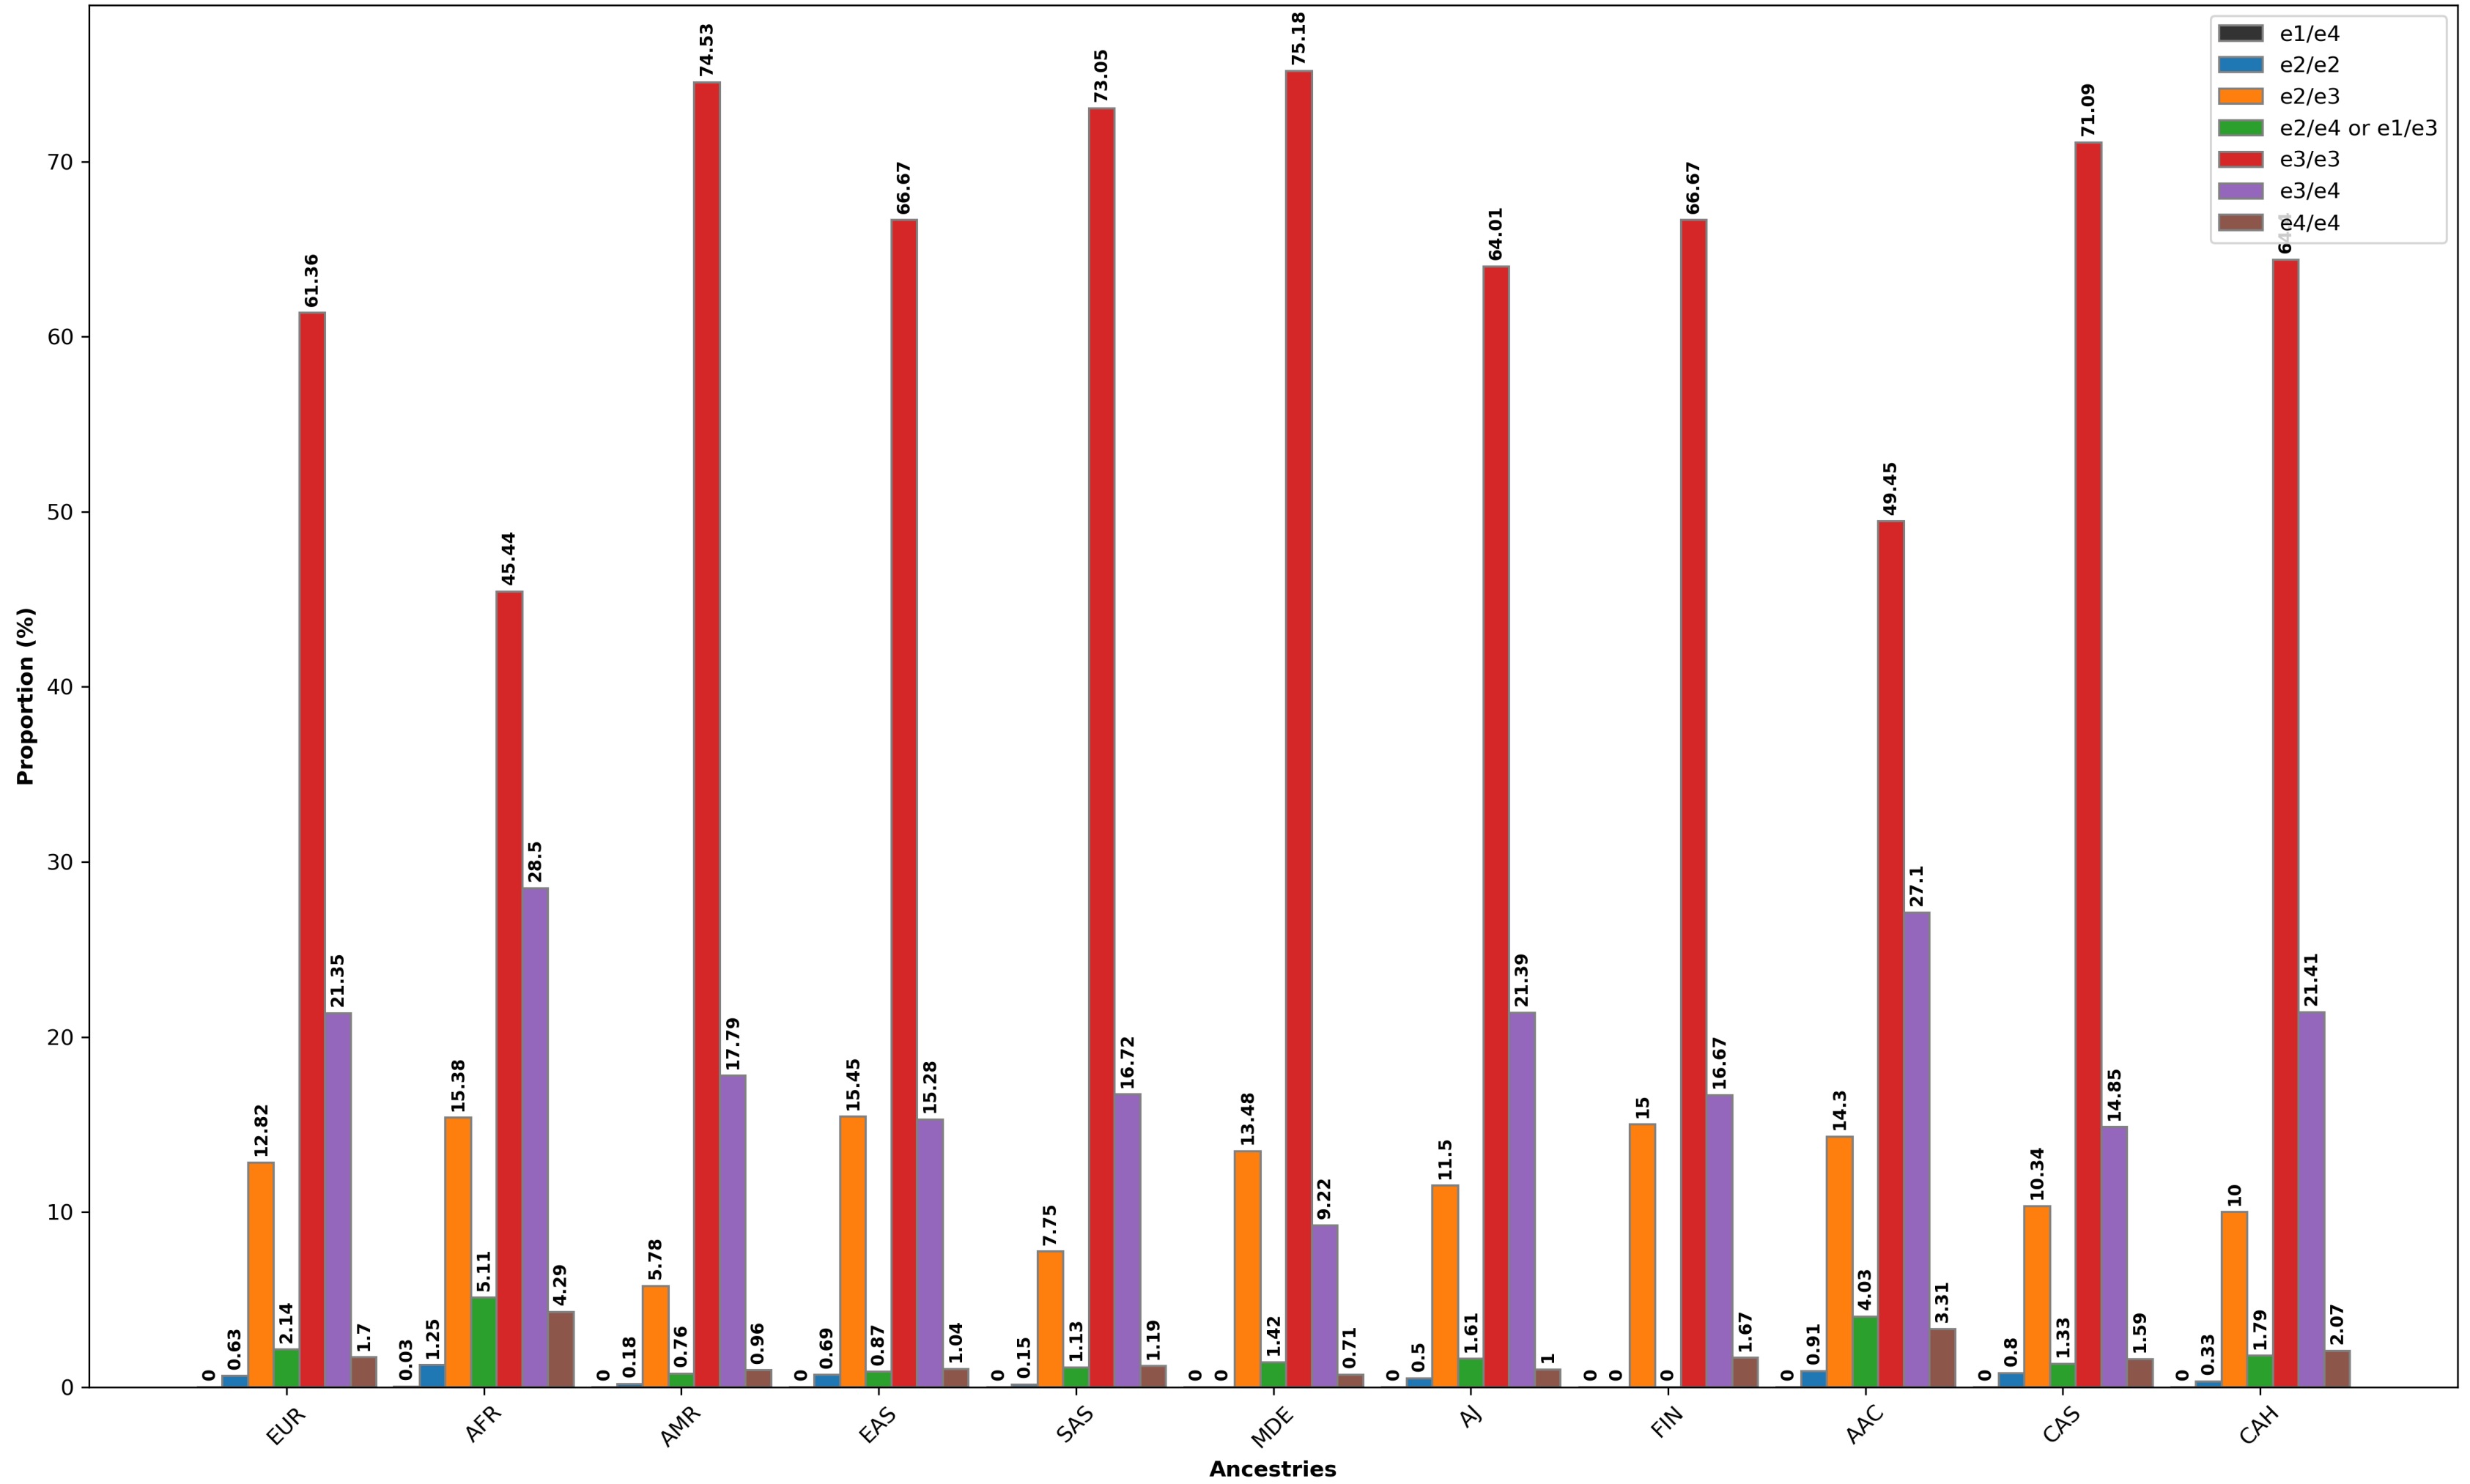

Supplement: Supplementary file [file media-9.pdf]
